# Supplementary material
Source: publisher figshare collection journal article supplement (https://karger.figshare.com/articles/dataset/_/5123620)
Supplement: Supplementary file 1 [file 1]

Archive with 9 entries (9 files):
- 000339170_sm_Table_A.pdf
- 000339170_sm_Table_B.pdf
- 000339170_sm_Table_C.pdf
- 000339170_sm_Table_D.pdf
- 000339170_sm_Table_E.pdf
- 000339170_sm_Table_F.pdf
- 000339170_sm_Table_G.pdf
- 000339170_sm_Table_H.pdf
- 000339170_sm_Table_I.pdf
