# Supplementary material
Source: publisher figshare collection journal article supplement (https://karger.figshare.com/articles/dataset/_/5123620)
Supplement: Supplementary file 1 [file 1 › 000339170_sm_Table_A.pdf]

# Online Supplemental Table

Table A. Relative risk of intra/postoperative complications on mortality as basis of calculating the composite morbidity score (CMS), n = 847.

| Complication                 | Number of patients with complication | Risk of death with complication | Risk of death without complication | Relative risk (95% CI) |
|------------------------------|--------------------------------------|---------------------------------|------------------------------------|------------------------|
| Myocardial infarction        | 8                                    | 12.5%                           | 2.4%                               | 5.24 (0.80-34.50)      |
| Reoperation                  | 24                                   | 8.3%                            | 2.3%                               | 3.61 (0.89-14.63)      |
| Cardiac arrest               | 25                                   | 24.0%                           | 1.8%                               | 13.15 (5.57-31.05)     |
| Prolonged ventilation (>24h) | 97                                   | 14.4%                           | 0.9%                               | 15.46 (6.40-37.37)     |
| Rethoracotomy                | 54                                   | 11.1%                           | 1.9%                               | 5.87 (2.38-14.53)      |
| Wound infection              | 118                                  | 3.4%                            | 2.3%                               | 1.45 (0.50-4.25)       |
| Renal failure                | 83                                   | 6.0%                            | 2.1%                               | 2.88 (1.08-7.65)       |
| Pneumothorax                 | 50                                   | 8.0%                            | 2.1%                               | 3.75 (1.31-10.73)      |
| Pericardial effusion         | 70                                   | 8.6%                            | 1.9%                               | 4.44 (1.78-11.08)      |
| Pleural effusion             | 394                                  | 3.3%                            | 1.8%                               | 1.87 (0.78-4.46)       |
| Arrhythmia                   | 279                                  | 4.7%                            | 1.4%                               | 3.31 (1.39-7.89)       |
| Transient delirium           | 130                                  | 2.3%                            | 2.5%                               | 0.92 (0.28-3.08)       |

CMS for the study sample: M = 5.89, SD = 7.85, range 0-47.86.
