# Supplementary material
Source: publisher figshare collection journal article supplement (https://karger.figshare.com/articles/dataset/_/5123620)
Supplement: Supplementary file 1 [file 1 › 000339170_sm_Table_B.pdf]

Online Supplemental Table

Table B. Group comparison without/with propensity score adjustment (only patients who preferred interventions; refusers excluded)

|                         | control group<br>(n = 260) | intervention group<br>(n = 269) | <i>F</i> -statistics<br>before<br>stratification <sup>#</sup> | <i>F</i> -statistics<br>after<br>stratification <sup>§</sup> |
|-------------------------|----------------------------|---------------------------------|---------------------------------------------------------------|--------------------------------------------------------------|
|                         | M (SD)                     | M (SD)                          |                                                               |                                                              |
| Age                     | 65.77 (8.82)               | 66.66 (8.73)                    | 1.37                                                          | 0.00                                                         |
| BMI                     | 28.24 (4.10)               | 28.44 (4.70)                    | 0.27                                                          | 0.01                                                         |
| Preoperative mobility   | 139.15 (39.50)             | 149.76 (37.05)                  | 10.16**                                                       | 0.44                                                         |
| EuroSCORE               | 4.06 (2.64)                | 4.39 (2.80)                     | 1.87                                                          | 0.01                                                         |
| Bypasses                | 2.96 (1.04)                | 2.76 (1.00)                     | 5.04*                                                         | 0.02                                                         |
| Serum creatinine        | 93.08 (23.86)              | 93.10 (32.91)                   | 0.00                                                          | 0.02                                                         |
| Social support          | 4.13 (0.63)                | 4.13 (0.67)                     | 0.00                                                          | 0.41                                                         |
| Preoperative anxiety    | 6.77 (3.67)                | 7.37 (3.83)                     | 3.45                                                          | 0.33                                                         |
| Preoperative depression | 5.24 (3.68)                | 6.16 (3.70)                     | 8.11**                                                        | 0.19                                                         |
| Religiosity             | 28.72 (13.63)              | 31.38 (15.39)                   | 4.42*                                                         | 0.62                                                         |
| Preop. positive mood    | 2.88 (0.53)                | 2.77 (0.56)                     | 5.58*                                                         | 0.10                                                         |
| Preop. negative mood    | 2.24 (0.77)                | 2.47 (0.76)                     | 12.44***                                                      | 0.46                                                         |
| Gender (male=1)         | 0.74 (0.44)                | 0.72 (0.45)                     | 0.20                                                          | 0.01                                                         |
| Valve replacement       | 0.09 (0.29)                | 0.14 (0.35)                     | 3.07                                                          | 0.08                                                         |
| OPCAB                   | 0.21 (0.41)                | 0.10 (0.30)                     | 13.76***                                                      | 0.15                                                         |
| MIDCAB                  | 0.02 (0.14)                | 0.04 (0.21)                     | 2.74                                                          | 0.35                                                         |

\* $p < .05$ ; \*\* $p < .01$ ; \*\*\* $p < .001$

<sup>#</sup> *F*-statistic = square of two-sample *t*-statistic

<sup>§</sup> *F*-statistic for main effect of intervention after adjusting for propensity score quintile
