# Supplementary material
Source: publisher figshare collection journal article supplement (https://karger.figshare.com/articles/dataset/_/5123620)
Supplement: Supplementary file 1 [file 1 › 000339170_sm_Table_C.pdf]

# Online Supplemental Table

Table C: Missingness of variables used for building the multiple imputation model (N = 847)

| Group              | Missing (%) | Description of variables                                    |
|--------------------|-------------|-------------------------------------------------------------|
| Design variables   | 0           | Group: intervention or control <sup>#</sup>                 |
| Covariates         | 0           | Hospital: Bernau or Jena <sup>#</sup>                       |
|                    | 0           | Preference: preferred interventions or refusal <sup>#</sup> |
|                    | 0           | Gender: female or male <sup>#</sup>                         |
|                    | 0           | Age <sup>#</sup>                                            |
|                    | 99 (11.7)   | Preoperative mobility measured by 2MWT                      |
|                    | 118 (13.9)  | Preoperative anxiety                                        |
|                    | 116 (13.7)  | Preoperative depression                                     |
|                    | 127 (15.0)  | Preoperative social support                                 |
|                    | 148 (17.5)  | Preoperative well-being (positive mood)                     |
|                    | 141 (16.6)  | Preoperative well-being (negative mood)                     |
|                    | 156 (18.4)  | Religiosity                                                 |
|                    | 0           | Number of bypasses <sup>#</sup>                             |
|                    | 0           | Valve replacement <sup>#</sup>                              |
|                    | 4 (0.5)     | EuroSCORE                                                   |
|                    | 4 (0.5)     | Serum creatinine                                            |
|                    | 170 (20.1)  | BMI                                                         |
| Treatment outcomes | 0           | Myocardial infarction <sup>#</sup>                          |
|                    | 1 (0.1)     | Reoperation                                                 |
|                    | 3 (0.4)     | Cardiac arrest                                              |
|                    | 42 (5.0)    | Prolonged ventilation                                       |
|                    | 0           | Graft occlusion <sup>#</sup>                                |

|            |                                                      |
|------------|------------------------------------------------------|
| 2 (0.2)    | Rethoracotomy                                        |
| 0          | Wound infection <sup>#</sup>                         |
| 0          | Renal failure <sup>#</sup>                           |
| 0          | Pneumothorax <sup>#</sup>                            |
| 0          | Pericardial effusion <sup>#</sup>                    |
| 0          | Pleural effusion <sup>#</sup>                        |
| 0          | Mediastinitis <sup>#</sup>                           |
| 0          | Transient delirium <sup>#</sup>                      |
| 1 (0.1)    | Arrythmia                                            |
| 0          | In-hospital mortality <sup>#</sup>                   |
| 185 (21.8) | Postoperative anxiety                                |
| 183 (21.6) | Postoperative depression                             |
| 148 (17.5) | Postoperative well-being (positive mood)             |
| 141 (16.6) | Postoperative well-being (negative mood)             |
| 186 (22.0) | Patient satisfaction                                 |
| 210 (24.8) | Postoperative pain                                   |
| 71 (27.4)  | Helping alliance perceived by patient <sup>§</sup>   |
| 66 (25.5)  | Helping alliance perceived by therapist <sup>§</sup> |

---

<sup>#</sup>used as auxiliary variable in the imputation model; <sup>§</sup>imputed only for patients of the intervention group ( $n = 259$ )
