# Supplementary material
Source: publisher figshare collection journal article supplement (https://karger.figshare.com/articles/dataset/_/5123620)
Supplement: Supplementary file 1 [file 1 › 000339170_sm_Table_D.pdf]

## Online Supplemental Table

Table D. Descriptive statistics of original and imputed data.

| Variable                                              | original data |        |       | imputed data |        |       |
|-------------------------------------------------------|---------------|--------|-------|--------------|--------|-------|
|                                                       | n             | M      | SD    | n            | M      | SD    |
| BMI                                                   | 677           | 28.42  | 4.24  | 847          | 28.46  | 4.35  |
| Mobility                                              | 748           | 144.91 | 37.81 | 847          | 144.45 | 38.74 |
| EuroSCORE                                             | 843           | 4.25   | 2.76  | 847          | 4.24   | 2.76  |
| Social support                                        | 720           | 4.17   | 0.65  | 847          | 4.14   | 0.65  |
| Anxiety (pre)                                         | 729           | 6.36   | 3.72  | 847          | 6.47   | 3.72  |
| Depression (pre)                                      | 731           | 5.15   | 3.75  | 847          | 5.35   | 3.75  |
| Religiosity                                           | 691           | 27.20  | 13.90 | 847          | 28.19  | 13.73 |
| Positive mood (pre)                                   | 699           | 2.90   | 0.57  | 847          | 2.88   | 0.56  |
| Negative mood (pre)                                   | 706           | 2.20   | 0.76  | 847          | 2.24   | 0.76  |
| Serum creatinine                                      | 843           | 93.04  | 28.95 | 847          | 93.04  | 28.90 |
| Postoperative anxiety <sup>#</sup>                    | 662           | 5.77   | 3.76  | 826          | 5.97   | 3.73  |
| Postoperative depression <sup>#</sup>                 | 664           | 5.14   | 4.08  | 826          | 5.40   | 4.02  |
| Postoperative positive mood <sup>#</sup>              | 623           | 2.82   | 0.58  | 826          | 2.81   | 0.59  |
| Postoperative negative mood <sup>#</sup>              | 625           | 2.36   | 0.77  | 826          | 2.40   | 0.76  |
| Patient satisfaction <sup>#</sup>                     | 661           | 3.61   | 0.40  | 826          | 3.60   | 0.40  |
| Postoperative pain <sup>#</sup>                       | 643           | 5.54   | 2.58  | 826          | 5.61   | 2.49  |
| Helping alliance perceived by patient <sup>#§</sup>   | 188           | 54.47  | 11.79 | 259          | 52.73  | 11.62 |
| Helping alliance perceived by therapist <sup>#§</sup> | 191           | 48.68  | 9.77  | 259          | 48.36  | 9.93  |
|                                                       | n             | %      |       | n            | %      |       |
| Reoperation                                           | 846           | 2.83   |       | 847          | 2.83   |       |
| Cardiac arrest                                        | 845           | 2.95   |       | 847          | 2.95   |       |

|                       |     |       |     |       |
|-----------------------|-----|-------|-----|-------|
| Prolonged ventilation | 805 | 10.51 | 847 | 11.81 |
| Rethoracotomy         | 845 | 6.38  | 847 | 6.49  |
| Arrhythmia            | 846 | 32.94 | 847 | 32.94 |

---

<sup>#</sup>patients who died within hospital stay were excluded from imputation (n = 21); <sup>§</sup>imputed only for patients of the intervention group (n = 259, deaths excluded)
