# Supplementary material
Source: publisher figshare collection journal article supplement (https://karger.figshare.com/articles/dataset/_/5123620)
Supplement: Supplementary file 1 [file 1 › 000339170_sm_Table_E.pdf]

Online Supplemental Table

Table E. Contents of patient-oriented conversations in psychological and spiritual interventions

| preoperative interventions (% of patients) |     | postoperative interventions (% of patients) |     |
|--------------------------------------------|-----|---------------------------------------------|-----|
| Family situation                           | 95% | Family situation                            | 73% |
| Family conflicts                           | 31% | Family conflicts                            | 25% |
| Missing closeness to significant others    | 23% | Missing closeness to significant others     | 21% |
| Job situation                              | 58% | Job situation                               | 29% |
| Potential support                          | 58% | Potential support                           | 52% |
| Interest in religious topics               | 19% | Interest in religious topics                | 6%  |
| Faith                                      | 15% | Faith                                       | 12% |
| Prayer                                     | 12% | Prayer                                      | 9%  |
| Religious experiences                      | 10% | Religious experiences                       | 6%  |
| Church/religious community                 | 24% | Church/religious community                  | 10% |
| Medical conditions                         | 61% | Medical conditions                          | 76% |
| Hospital setting as stressful situation    | 25% | Hospital setting as stressful situation     | 54% |
| Other patients                             | 13% | Other patients                              | 35% |
|                                            |     | Health personnel                            | 29% |
| Emotional status                           | 78% | Emotional status                            | 86% |
| Other conflicts                            | 28% | Other conflicts                             | 33% |
| Other critical life events                 | 46% | Other critical life events                  | 26% |
| Fear of surgery                            | 69% | Delay of surgery                            | 24% |
| Fear of complications                      | 31% | Perception of surgery                       | 47% |
| Fear of pain                               | 14% | Anaesthesia                                 | 33% |
| Fear of dependence                         | 13% | Intensive care                              | 69% |

|               |     |                                        |     |
|---------------|-----|----------------------------------------|-----|
| Fear of death | 28% | Postoperative recovery                 | 97% |
| Other fears   | 15% | Pain                                   | 75% |
|               |     | Coping with postoperative delirium     | 19% |
|               |     | Threatened death/near-death experience | 11% |
|               |     | Fears after surgery                    | 23% |
|               |     | Further rehabilitation                 | 84% |
|               |     | Preparation for discharge              | 69% |
|               |     | Change of life style                   | 43% |

---
