# Supplementary material
Source: publisher figshare collection journal article supplement (https://karger.figshare.com/articles/dataset/_/5123620)
Supplement: Supplementary file 1 [file 1 › 000339170_sm_Table_F.pdf]

# Online Supplemental Table

Table F. Techniques of preoperatively and postoperatively applied psychological interventions

| preoperative psychological interventions<br>(% of patients) |     | postoperative psychological interventions<br>(% of patients) |     |
|-------------------------------------------------------------|-----|--------------------------------------------------------------|-----|
| Self-evaluation                                             | 77% | Strategies for coping with pain                              | 35% |
| Evaluation by significant others                            | 26% | Motivation to exercise therapy                               | 71% |
| Actualizing patients' resources                             | 83% | Emotional support                                            | 95% |
| Focussing on patients' future                               | 87% | Focussing on patients' future                                | 92% |
| Relaxation techniques                                       | 4%  | Relaxation techniques                                        | 6%  |
| Clarifying medical questions                                | 36% | Clarifying medical questions                                 | 31% |
| Cognitive restructuring of anxiety                          | 23% | Explanation of postoperative delirium                        | 17% |
| Dissociation of additional<br>psychological stress          | 21% | Association of additional psychological<br>stress            | 11% |
| Focussing on patients' social support                       | 61% | Focussing on patients' social support                        | 68% |
| Assurance of further psychological<br>support               | 87% | Assurance of further psychological<br>support                | 95% |
