# Supplementary material
Source: publisher figshare collection journal article supplement (https://karger.figshare.com/articles/dataset/_/5123620)
Supplement: Supplementary file 1 [file 1 › 000339170_sm_Table_G.pdf]

# Online Supplemental Table

Table G. Techniques of preoperatively and postoperatively applied spiritual interventions

| preoperative spiritual interventions<br>(% of patients) |     | postoperative spiritual interventions<br>(% of patients) |     |
|---------------------------------------------------------|-----|----------------------------------------------------------|-----|
| Conversation about life experiences                     | 48% | Recall of religious interpretation                       | 27% |
| Recall of life experiences                              | 28% | Creation of meaning and focussing on patients' future    | 70% |
| Intercessory prayer                                     | 22% | Thanksgiving and intercessory prayer                     | 26% |
| Lord's Prayer                                           | 13% | Lord's Prayer                                            | 3%  |
| Blessing without touch                                  | 16% | Blessing without touch                                   | 18% |
| Blessing with touch                                     | 3%  | Blessing with touch                                      | 12% |
| Anointment with fragrant oil                            | 0%  |                                                          |     |
| Assurance of further pastoral support                   | 93% | Assurance of further pastoral support                    | 85% |
| Assurance of pastoral prayer during treatment           | 32% | Assurance of pastoral prayer during treatment            | 33% |
