# Supplementary material
Source: publisher figshare collection journal article supplement (https://karger.figshare.com/articles/dataset/_/5123620)
Supplement: Supplementary file 1 [file 1 › 000339170_sm_Table_H.pdf]

# Online Supplemental Table

Table H. Results of subgroup analyses of patients with specific preferences only

|                            | control group | intervention group |      |                    |
|----------------------------|---------------|--------------------|------|--------------------|
|                            | n = 178       | n = 190            |      |                    |
|                            | M (SD)        | M (SD)             | p    | d (95% CI)         |
| Morbidity <sup>#</sup>     | 4.86 (9.35)   | 5.48 (9.21)        | .514 | -0.07 (-0.27-0.14) |
| Anxiety <sup>§</sup>       | 6.43 (4.24)   | 6.15 (4.16)        | .515 | 0.07 (-0.14-0.27)  |
| Depression <sup>§</sup>    | 5.65 (4.43)   | 5.64 (4.34)        | .987 | 0.002 (-0.20-0.21) |
| Positive mood <sup>§</sup> | 2.69 (0.68)   | 2.84 (0.66)        | .037 | 0.22 (0.01-0.42)   |
| Negative mood <sup>§</sup> | 2.48 (0.79)   | 2.38 (0.77)        | .252 | 0.12 (-0.09-0.32)  |
| Satisfaction               | 3.60 (0.53)   | 3.57 (0.52)        | .538 | -0.06 (-0.27-0.14) |
| Pain                       | 3.35 (2.28)   | 3.30 (2.23)        | .833 | 0.02 (-0.18-0.23)  |

Patients who refused interventions or preferred no specific kind of intervention were excluded from the analysis. ANOVA intervention x propensity strata (complex propensity score; including interaction and quadratic terms); CMS computation based on N=847; <sup>#</sup>patients who died included: n = 182 control group, n = 196 intervention group; <sup>§</sup>adjusted for preoperative values
