# Supplementary material
Source: publisher figshare collection journal article supplement (https://karger.figshare.com/articles/dataset/_/5123620)
Supplement: Supplementary file 1 [file 1 › 000339170_sm_Table_I.pdf]

# Online Supplemental Table

Table I. Results of subgroup analyses of patients with high anxiety and/or depression only

|                            | control group | intervention group |      |                    |
|----------------------------|---------------|--------------------|------|--------------------|
|                            | n = 128       | n = 142            |      |                    |
|                            | M (SD)        | M (SD)             | p    | d (95% CI)         |
| Morbidity <sup>#</sup>     | 5.78 (10.87)  | 5.09 (9.09)        | .570 | 0.07 (-0.17-0.31)  |
| Anxiety <sup>§</sup>       | 8.08 (5.06)   | 7.55 (4.22)        | .357 | 0.11 (-0.12-0.35)  |
| Depression <sup>§</sup>    | 6.69 (5.22)   | 6.90 (4.35)        | .723 | -0.04 (-0.28-0.20) |
| Positive mood <sup>§</sup> | 2.69 (0.76)   | 2.71 (0.63)        | .841 | 0.03 (-0.21-0.27)  |
| Negative mood <sup>§</sup> | 2.73 (0.91)   | 2.62 (0.76)        | .261 | 0.14 (-0.10-0.37)  |
| Satisfaction               | 3.56 (0.66)   | 3.49 (0.55)        | .369 | -0.11 (-0.35-0.13) |
| Pain                       | 3.52 (2.64)   | 3.39 (2.20)        | .658 | 0.05 (-0.19-0.29)  |

Patients who refused interventions or with low anxiety and depression scores were excluded from the analysis. ANOVA intervention x propensity strata (complex propensity score; including interaction and quadratic terms); CMS computation based on N=847; <sup>#</sup>patients who died included: n = 129 control group, n = 146 intervention group; <sup>§</sup>adjusted for preoperative values
